# Supplementary material for: Dynamical evolution of the Schottky barrier as a determinant contribution to electron–hole pair stabilization and photocatalysis of plasmon-induced hot carriers
Source: Royal Society of Chemistry journal article supplement (doi:10.1039/d1nr04699c), 2022-01-01
Supplement: d1nr04699c1.pdf [file d1nr04699c1.pdf]

**Supplementary material for:**

**Dynamical evolution of the Schottky barrier as a  
determinant contribution to electron-hole pair  
stabilization and photocatalysis of  
plasmon-induced hot carriers**

Matias Berdakin,<sup>\*,†,‡</sup> German Soldano,<sup>†,‡</sup> Franco P. Bonafé,<sup>¶</sup> Varlamova  
Liubov,<sup>§</sup> Bálint Aradi,<sup>§</sup> Thomas Frauenheim,<sup>§,||</sup> and Cristián G. Sánchez<sup>⊥</sup>

<sup>†</sup>*INFIQC (CONICET-UNC), Ciudad Universitaria, Pabellón Argentina, 5000 Córdoba,  
Argentina.*

<sup>‡</sup>*Departamento de Química Teórica y Computacional, Fac. de Ciencias Químicas,  
Universidad Nacional de Córdoba, Ciudad Universitaria, Pabellón Argentina, X5000HUA  
Córdoba, Argentina.*

<sup>¶</sup>*Max Planck Institute for the Structure and Dynamics of Matter, Center for Free Electron  
Laser Science, Hamburg, Germany.*

<sup>§</sup>*Bremen Center for Computational Materials Science, Universität Bremen, Bremen,  
Germany*

<sup>||</sup>*Computational Science Research Center (CSRC) Beijing and Computational Science and  
Applied Research (CSAR) Institute, Shenzhen, China*

<sup>⊥</sup>*Instituto Interdisciplinario de Ciencias Básicas, Facultad de Ciencias Exactas y  
Naturales, Universidad Nacional de Cuyo, CONICET, Padre Jorge Contreras 1300,  
Mendoza M5502JMA, Argentina*

E-mail: matiasberdakin@unc.edu.ar

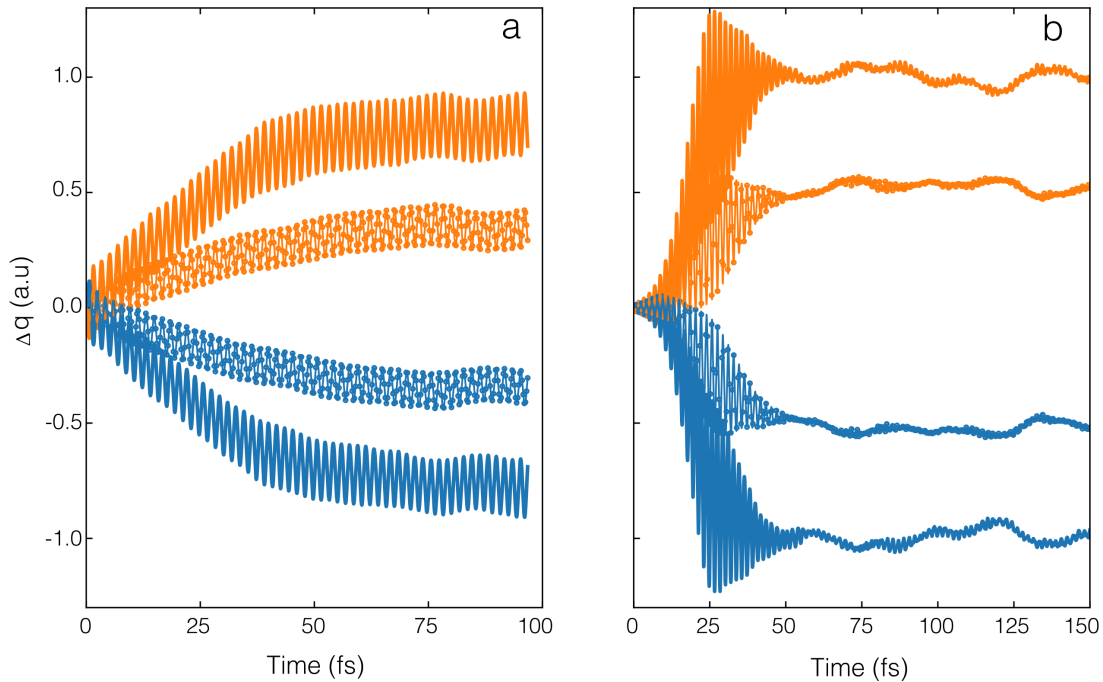

Figure S1: Panels a and b present the charge evolution ( $\Delta q$ ) of Au NP (orange) and [TiO<sub>2</sub> + CO] (blue), compared to the ground state, as a function of time for a continuum and a pulsed laser respectively. Positive/negative values of  $\Delta q$  stand for electron loss/accumulation. continuous line and dotted line for simulations with and without the CO molecules, respectively.

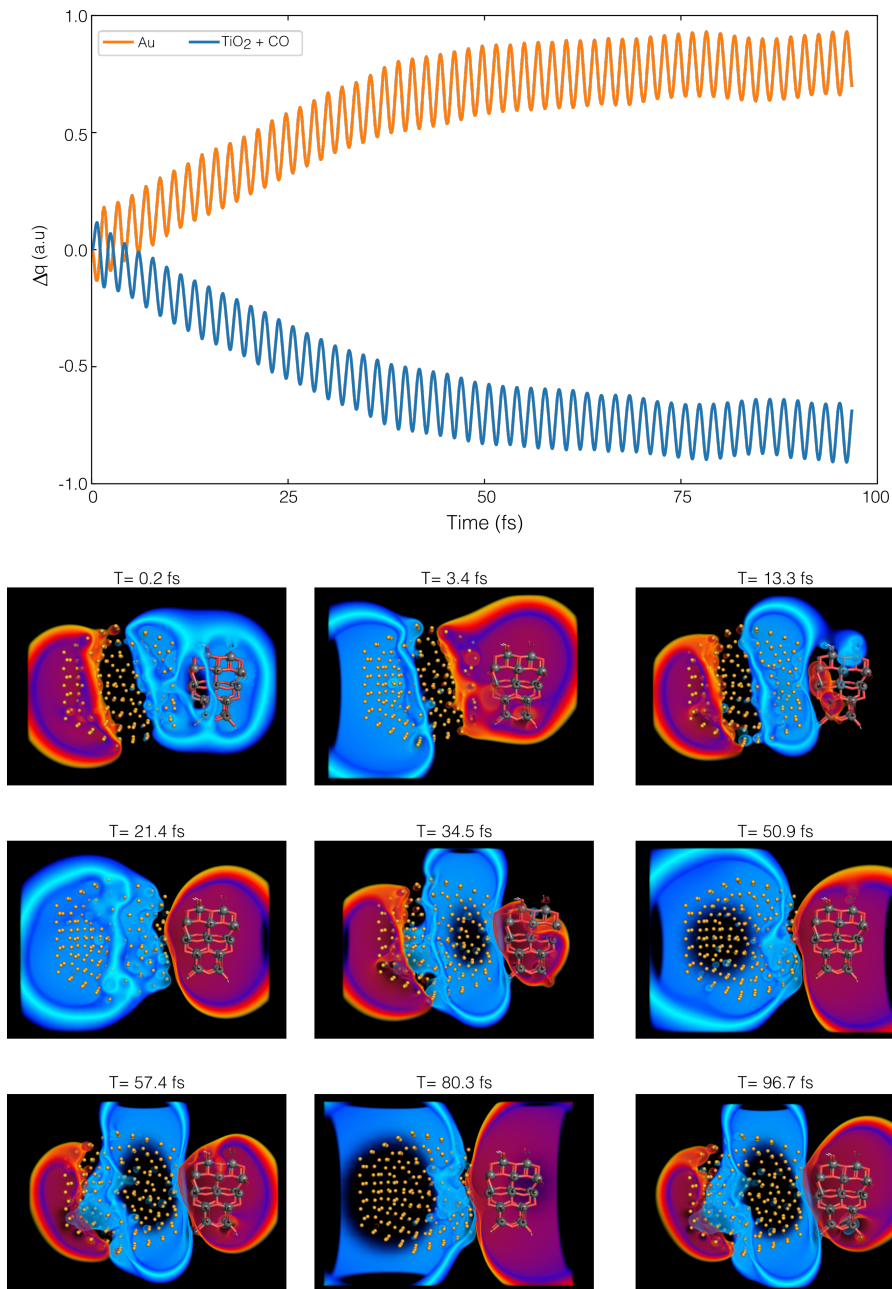

Figure S2: Up: charge evolution ( $\Delta q$ ) of Au NP (orange) and  $[\text{TiO}_2 + \text{CO}]$  (blue), compared to the ground state, as a function of time for a continuum laser. Down: Developed electrostatic potential respect to the ground state  $\Delta V = V_t - V_{t=0}$  dynamically rising a potential barrier. Slice of the 3d volume rendering centered at the interparticle axes. Blue tones depict  $\Delta V > 0$  while violet to yellow scale encodes  $\Delta V < 0$ .

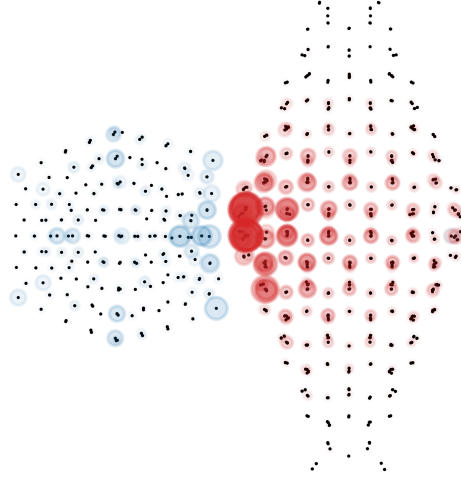

Figure S3:  $x - z$  projection of the atomic charge modification ( $\Delta q$ ). For each atom,  $\Delta q$  is represented by a circle, the size and opacity of the circle increases as  $\Delta q$  does. To allow differentiating the bulk and the out-layer atoms, an anatase  $\text{TiO}_2$  particle with 852 atoms was used.

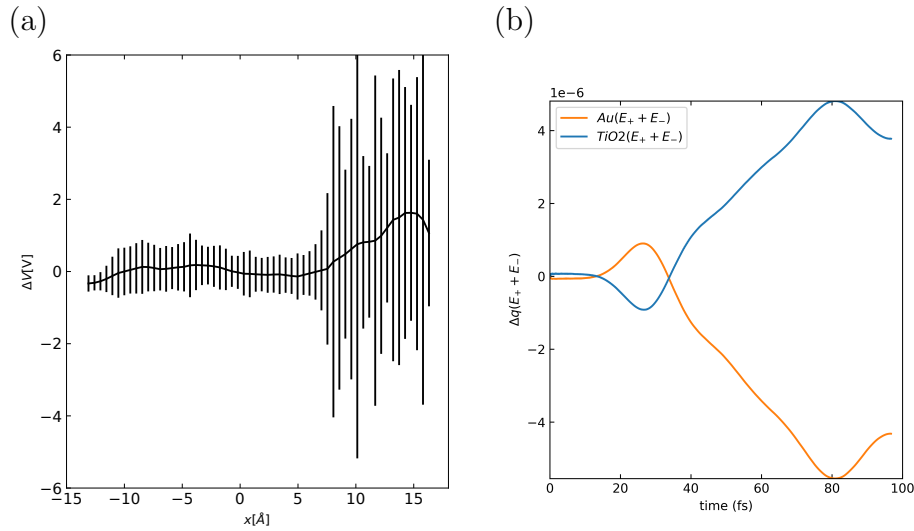

Figure S4: **(a)** presents  $\Delta V$  along  $x$  axes at the ground state. The error bar represents the standard deviation of  $\Delta V$  in the  $y - z$  plane. **(b)** Charge rectification obtained when an electric field, polarized in the positive or negative  $x$  direction ( $E_+$  and  $E_-$ , respectively), is applied to the system at the ground state. Orange and blue lines for Au NP and  $[\text{TiO}_2 + \text{CO}]$  particles, respectively. Note that a negative/positive value of  $[\Delta q(E_+ + E_-)]$  indicates that electrons flow preferentially in the negative/positive  $x$  direction.

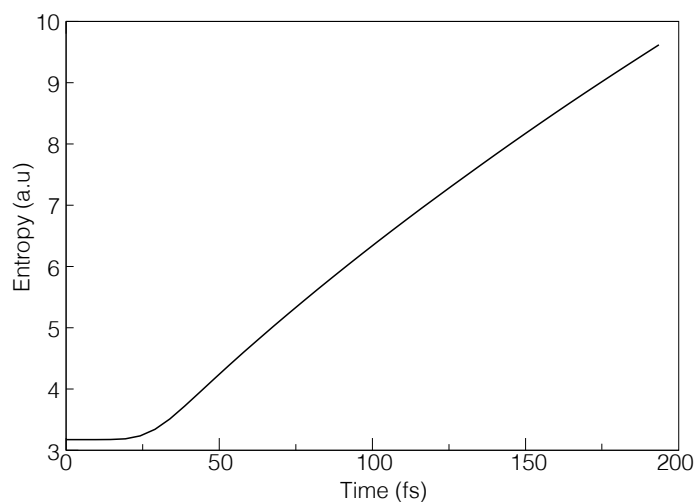

Figure S5: Electronic entropy evolution during the dynamics triggered by a laser pulse.

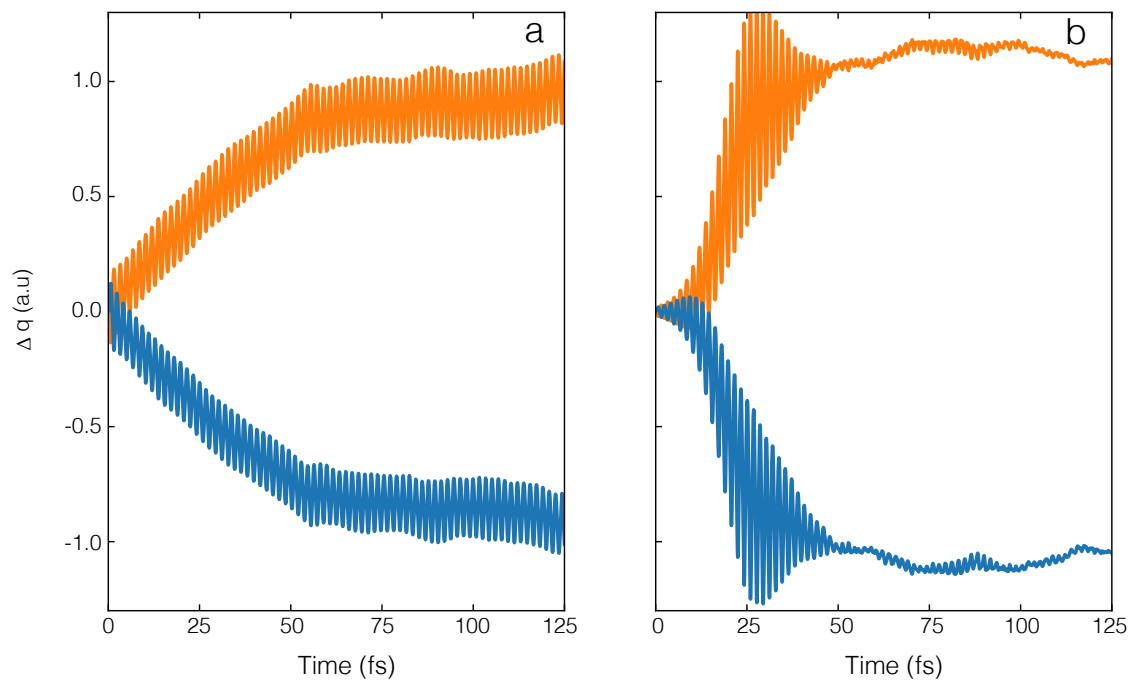

Figure S6: Panels a and b present the charge evolution ( $\Delta q$ ) of Au NP (orange) and  $[\text{TiO}_2 + \text{CO}]$  (blue), compared to the ground state, as a function of time for a continuum and a pulsed laser, respectively. In these simulations the electron and ion dynamics were coupled. Positive/negative values of  $\Delta q$  stand for electron loss/accumulation.

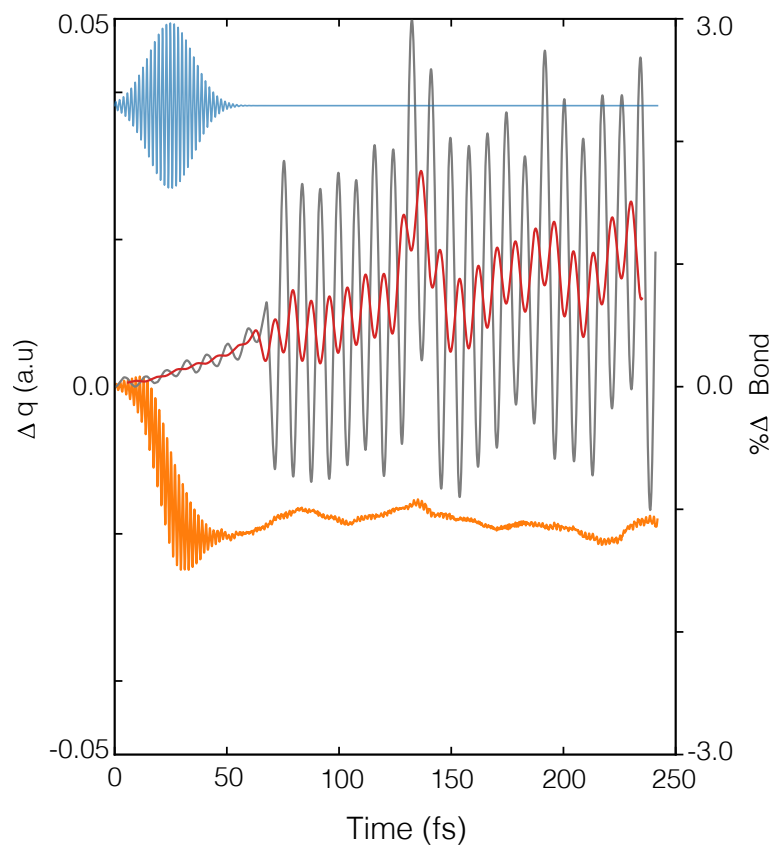

Figure S7: Hot carriers catalytic effect described by coupled electron-ion dynamics. The [Au-TiO<sub>2</sub>-H<sub>2</sub>] cluster was irradiated by a laser pulse. Orange and gray lines present the  $\Delta q$  for the H<sub>2</sub> molecules and the change of the H-H bond distance as a percentage of the ground state distance, respectively.

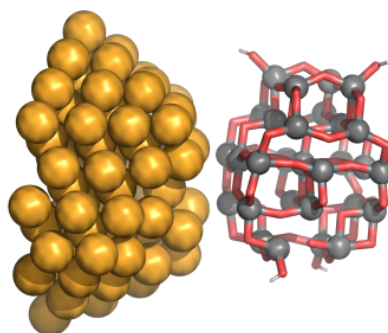

Figure S8: The model structure employed to compare the DFTB parameterization Vs. DFT simulations. This structure was generated using half of a 147 atom icosahedral Au NP and the  $\text{TiO}_2$  NP. For the structural optimization, the Au atoms at the cut plane were held fixed. The binding energy difference between the Au and  $\text{TiO}_2$  NP computed for the structure optimized at the DFT and the DFTB levels was  $\sim 6\%$  while the Au-Ti bond distance difference for the atoms at the interface was  $\sim 1\%$

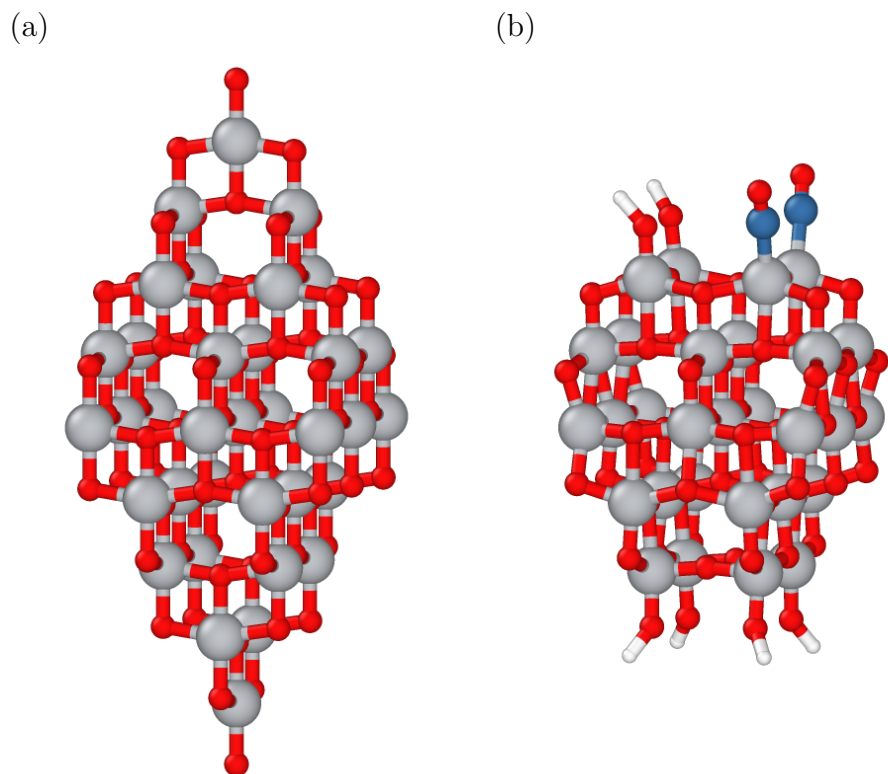

Figure S9: **(a)** Anatase  $\text{TiO}_2$  nanoparticle constructed with the Wulff approach, resulting in a bipyramid with eight (101) facets. **(b)** Former nanoparticle after truncation and addition of H atoms to passivate the O dangling bonds, and the adsorption of two CO molecules. Gray, red, white and blue particles correspond to Ti, O, H and C atoms, respectively.



(a)

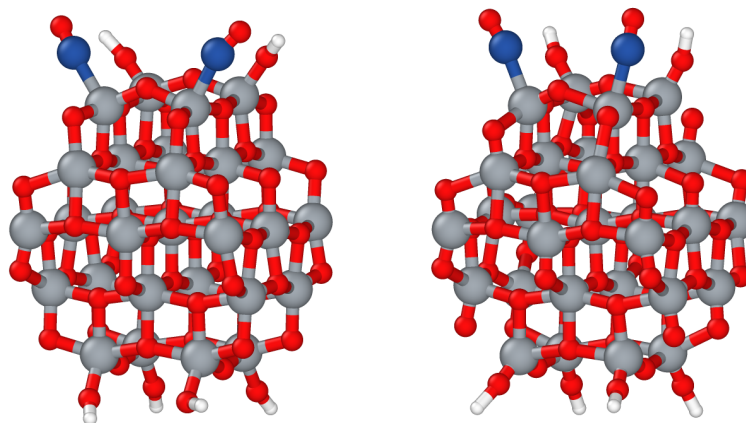

(b)

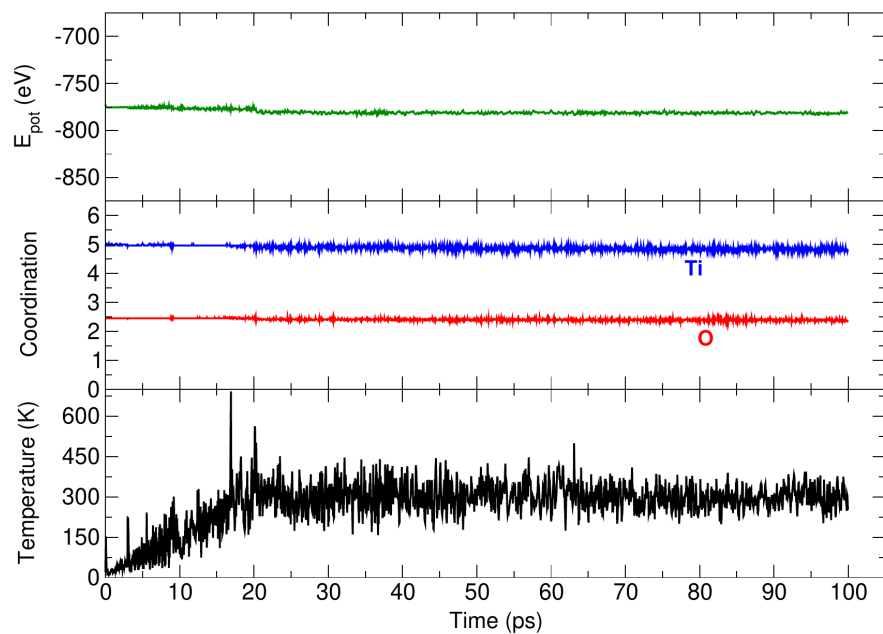

Figure S10: **(a)** Snapshots of the  $\text{TiO}_2$  nanoparticle at 20 ps (left) and 100 ps of the molecular dynamic simulation. Same atomic coloring as mentioned above is used. No reconstruction are observed, the nanoparticle integrity remains unaffected during the simulation. **(b)** Temperature, average coordination and potential energy of the molecular dynamic simulation. Nor the energy, neither the coordination of O and Ti atoms change significantly during the simulation.
